# Supplementary material for: Changes in Parent and Child Skin Carotenoids, Weight, and Dietary Behaviors over Parental Weight Management
Source: MDPI journal article supplement (doi:10.3390/nu13072227), 2021-06-29
Supplement: s1 [file s1]

**Supplemental Table S1:****Correlation Matrix between Child and Parent Weight Status and Skin Carotenoids at Baseline, 3-months, and 6-months**

|                         | Child BMIz         | Parent BMI         | Child Skin Carotenoids | Parent Skin Carotenoids |
|-------------------------|--------------------|--------------------|------------------------|-------------------------|
| Baseline (N=23)         |                    |                    |                        |                         |
| Child BMIz              | -                  |                    |                        |                         |
| Parent BMI              | r=.450*<br>p=.031  | -                  |                        |                         |
| Child Skin Carotenoids  | r=-.286<br>p=.186  | r=-.309<br>p=.152  | -                      |                         |
| Parent Skin Carotenoids | r=-.389<br>p=.066  | r=-.443*<br>p=.034 | r=.651**<br>p=.001     | -                       |
| 3-months (N=16)         |                    |                    |                        |                         |
| Child BMIz              | -                  |                    |                        |                         |
| Parent BMI              | r=.691**<br>p=.003 | -                  |                        |                         |
| Child Skin Carotenoids  | r=-.212<br>p=.430  | r=-.304<br>p=.253  | -                      |                         |
| Parent Skin Carotenoids | r=-.205<br>p=.447  | r=-.373<br>p=.154  | r=.499*<br>p=.049      | -                       |
| 6-months (N=11)         |                    |                    |                        |                         |
| Child BMIz              | -                  |                    |                        |                         |
| Parent BMI              | r=.729*<br>p=.011  | -                  |                        |                         |
| Child Skin Carotenoids  | r=-.165<br>p=.627  | r=-.117<br>p=.731  | -                      |                         |
| Parent Skin Carotenoids | r=-.346<br>p=.298  | r=-.178<br>p=.600  | r=.699*<br>p=.017      | -                       |

\*\*Correlation is significant at the .01 level; \*Correlation is significant at the .05 level
